# Supplementary material for: A novel Mn4+-activated layered oxide-fluoride perovskite-type KNaMoO2F4 red phosphor for wide gamut warm white light-emitting diode backlights
Source: Royal Society of Chemistry journal article supplement (doi:10.1039/d1dt01863a), 2021-01-01
Supplement: d1dt01863a1.pdf [file d1dt01863a1.pdf]

## **Electronic Supplementary Information (ESI)**

# **Novel Mn<sup>4+</sup>-activated layered oxide-fluoride perovskite KNaMoO<sub>2</sub>F<sub>4</sub> red phosphor for wide gamut warm white light- emitting diodes backlight**

**Jiao Wu<sup>1</sup>, Bo Wang<sup>1\*</sup>, Zhiyuan Liu<sup>1</sup>, Kang Zhang<sup>1</sup>, Xiaoshuang Li<sup>1</sup>, Jianhui  
Huang<sup>2</sup>, Pengfei Liu<sup>3</sup> and Qingguang Zeng<sup>1\*</sup>**

<sup>1</sup>School of Applied Physics and Materials, Wuyi University, Jiangmen, Guangdong  
529020, P.R. China

<sup>2</sup>College of Rare Earths, Jiangxi University of Science and Technology, Ganzhou,  
Jiangxi 341000, PR China

<sup>3</sup>Dongguan Neutron Science Center, Dongguan 523803, PR China

Corresponding Authors: [wangbo312@mails.ucas.ac.cn](mailto:wangbo312@mails.ucas.ac.cn); [zengqg@mail.ustc.edu.cn](mailto:zengqg@mail.ustc.edu.cn)

## Characterizations

The phase composition of  $\text{KNaMoO}_2\text{F}_4:\text{Mn}^{4+}$  were measured by a powder diffractometer (X' Pert PRO, Cu  $K\alpha$ ,  $\lambda = 1.5418 \text{ \AA}$ ). The photoluminescence (PL) spectra were recorded by Edinburgh Instruments (FLS 980) equipped with 450 W xenon lamps as the excitation source. The diffuse reflection (DR) spectra of the samples were carried out on an UV-Vis-NIR spectrophotometer (Lambda 950, Perkin Elmer), using  $\text{BaSO}_4$  as a standard reference. The morphologies of the samples were characterized using a scanning electron microscope (SEM, JSM-6700F). The electron paramagnetic resonance (EPR) spectrum of  $\text{K}_3\text{TaOF}_6:\text{Mn}^{4+}$  was obtained on a JES-FA 200 EPR spectrometer. High-resolution transmission electron microscopy (HRTEM) was recorded using a FEI Tecnai G2S-Twin. To investigate the electronic structures of pure  $\text{KNaMoO}_2\text{F}_4$ , calculations were performed by the plane-wave pseudopotential method<sup>[1]</sup> implemented in the CASTEP program based on density functional theory (DFT).<sup>[2]</sup> The kinetic energy cutoffs of 380 eV and Monkhorst-Pack  $k$ -point meshes with a density of  $(4 \times 4 \times 1)$  points in the Brillouin zone were chosen.<sup>[3]</sup>

## References

1. S. J. Clark, M. D. Segall, C. J. Pickard, P. J. Hasnip, M. J. Probert, K. Refson, M. C. Payne, *Zeitschrift Fur Kristallographie*, 2005, **22**, 567-570.
2. D. Vanderbilt, *Phys. Rev. B.*, 1990, **41**, 7892-7895.
3. H. J. Monkhorst, J. D. Pack, *Phys. Rev. B.*, 1976, **13**, 5188-5192.

## 1. Tables and Figures

**Table S1.** Rietveld refinement of X-ray diffraction data of  $\text{KNaMoO}_2\text{F}_4:0.01\text{Mn}^{4+}$ .

**Table S2.** Some bond lengths of  $\text{KNaMoO}_2\text{F}_4$ .

**Table S3 S4.** Current- and temperature-dependent CCT, Ra and CIE chromaticity coordinates of as-fabricated proof-of-concept w-LED.

**Fig. S1.** XRD patterns of  $\text{KNaMoO}_2\text{F}_4:x\text{Mn}^{4+}$ .

**Fig. S2.** Rietveld refinements of the observed XRD patterns for the  $\text{KNaMoO}_2\text{F}_4:0.01\text{Mn}^{4+}$ .

**Fig. S3.** (a) Calculated energy band structure of  $\text{KNaMoO}_2\text{F}_4$  (b) The DR spectra of  $\text{KNaMoO}_2\text{F}_4:x\text{Mn}^{4+}$ , the inset show the optical energy band based on the DR spectrum.

**Fig. S4.** (a) Room-temperature PL under 475 nm excitation (b) CIE chromaticity coordinate of the  $\text{KNaMoO}_2\text{F}_4:0.01\text{Mn}^{4+}$  phosphor (c) (d) Integrated emission intensity and fluorescence decay curve of the  $\text{KNaMoO}_2\text{F}_4:x\text{Mn}^{4+}$  phosphor.

**Fig. S5.** (a) Tanabe-Sugano energy diagram for  $\text{Mn}^{4+}$ . ( $3d^3$ ) in an octahedral crystal field. (b) The relationship between the  $\text{Mn}^{4+}:^2\text{E}$  energy level and the calculated nephelauxetic ratio in different  $\beta$  hosts.

**Fig. S6.** The PL spectrum of  $\text{KNaMoO}_2\text{F}_4:0.01\text{Mn}^{4+}$  at 4 K.

**Table S1** Rietveld refinement of X-ray diffraction data of  $\text{KNaMoO}_2\text{F}_4 \cdot 0.01\text{Mn}^{4+}$ 

| Formula                       | $\text{KNaMoO}_2\text{F}_4 \cdot 0.01\text{Mn}^{4+}$ |
|-------------------------------|------------------------------------------------------|
| Crystal system                | tetragonal                                           |
| Space group                   | P4/nmm                                               |
| Lattice parameters            |                                                      |
| a=b (Å)                       | 5.875                                                |
| c (Å)                         | 8.498                                                |
| $\alpha=\beta=\gamma$ (°)     | 90                                                   |
| Cell volume (Å <sup>3</sup> ) | 293.376                                              |
| R-factors                     |                                                      |
| R <sub>wp</sub> (%)           | 11.69                                                |
| R <sub>p</sub> (%)            | 8.45                                                 |

**Table S2** Some bond lengths of  $\text{KNaMoO}_2\text{F}_4$ .

| Atom | x     | y    | z    | Bond              | Length(Å) | Bond              | Length(Å) | Bond | Length(Å) |
|------|-------|------|------|-------------------|-----------|-------------------|-----------|------|-----------|
| Na   | -0.25 | 0.75 | 0.76 | Na-O <sub>1</sub> | 2.3408    | Na-O <sub>2</sub> | 2.3360    | Na-F | 2.2766    |
| K    | 0.25  | 0.75 | 0.50 | K-O <sub>2</sub>  | 2.9327    |                   |           |      |           |
| Mo   | 0.25  | 0.25 | 0.76 | Mo-O <sub>1</sub> | 1.6718    | Mo-O <sub>2</sub> | 2.1110    | Mo-F | 1.9704    |

**Table S3 S4.** Current- and temperature-dependent CCT, Ra and CIE chromaticity coordinates of as-fabricated proof-of-concept w-LED.

| mA                  | (lm/W) | x      | y      | CCT  | Ra   |
|---------------------|--------|--------|--------|------|------|
| 19.95               | 84.32  | 0.3394 | 0.3387 | 4490 | 83.5 |
| 49.96               | 81.43  | 0.3374 | 0.335  | 4476 | 83.3 |
| 99.97               | 75.98  | 0.335  | 0.3306 | 4467 | 83   |
| 149.9               | 71.19  | 0.333  | 0.327  | 4454 | 82.9 |
| 200                 | 67.25  | 0.3314 | 0.3243 | 4459 | 82.7 |
| 250                 | 63.67  | 0.33   | 0.3219 | 4452 | 82.5 |
| 300                 | 60.17  | 0.3284 | 0.3193 | 4452 | 82.4 |
| 349.9               | 57.16  | 0.3276 | 0.3179 | 4445 | 82.2 |
| 399.8               | 53.96  | 0.3261 | 0.3155 | 4445 | 82.2 |
| 449.9               | 51.1   | 0.3253 | 0.3141 | 4442 | 82   |
| Temperature<br>(°C) | (lm/W) | x      | y      | CCT  | Ra   |
| 30                  | 79.66  | 0.3349 | 0.3346 | 4493 | 83.3 |
| 40                  | 78.54  | 0.332  | 0.3318 | 4490 | 83.4 |
| 50                  | 77.25  | 0.3275 | 0.3269 | 4497 | 83.6 |
| 60                  | 76.32  | 0.323  | 0.3213 | 4500 | 82.2 |
| 70                  | 75.47  | 0.3194 | 0.3166 | 4507 | 81.9 |
| 80                  | 74.08  | 0.314  | 0.3093 | 4511 | 81   |
| 90                  | 72.87  | 0.3102 | 0.3042 | 4517 | 81   |
| 100                 | 71.11  | 0.306  | 0.2981 | 4520 | 81.2 |

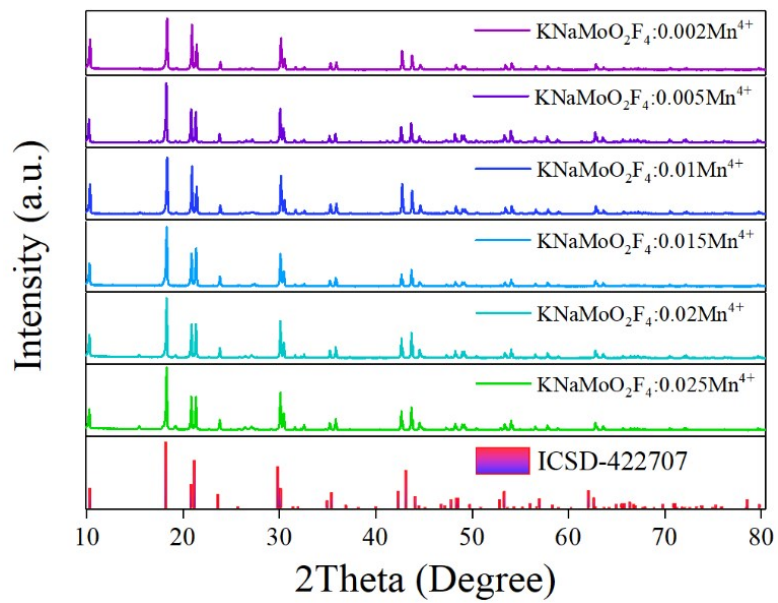

**Fig. S1.** XRD patterns of  $\text{KNaMoO}_2\text{F}_4:x\text{Mn}^{4+}$ .

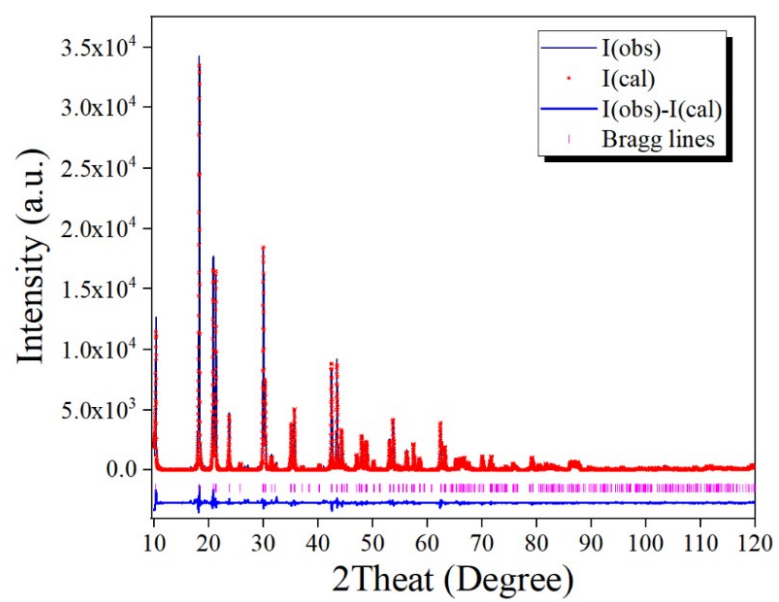

**Fig. S2.** Rietveld refinements of the observed XRD patterns for the  $\text{KNaMoO}_2\text{F}_4:0.01\text{Mn}^{4+}$ .

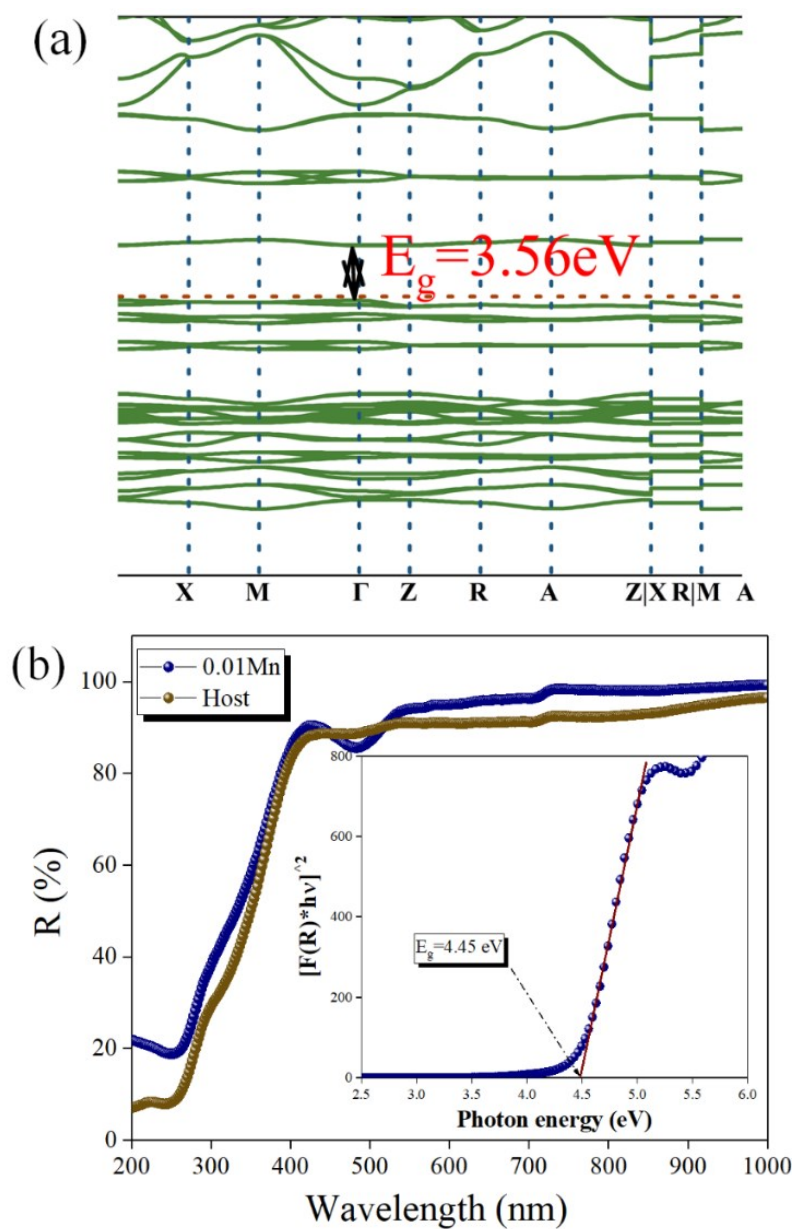

**Fig. S3.** (a) Calculated energy band structure of  $\text{KNaMoO}_2\text{F}_4$  (b) The DR spectra of  $\text{KNaMoO}_2\text{F}_4:\text{xMn}^{4+}$ , the inset show the optical energy band based on the DR spectrum.



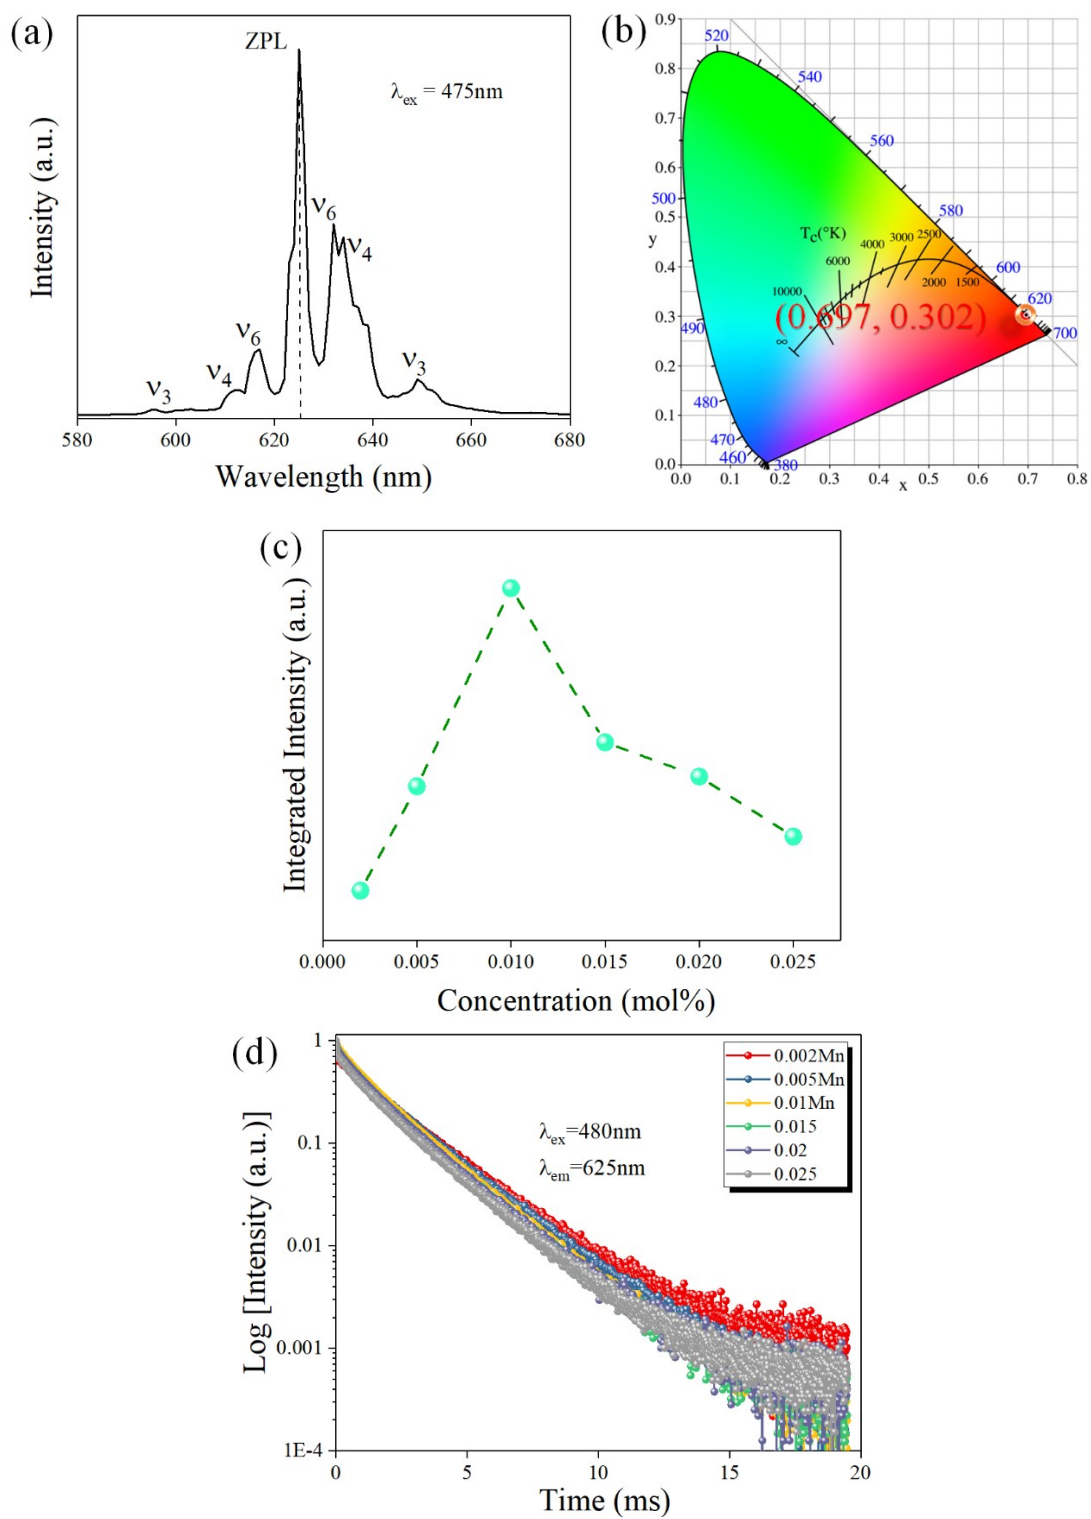

**Fig. S4.** (a) Room-temperature PL under 475 nm excitation (b) CIE chromaticity coordinate of the  $\text{KNaMoO}_2\text{F}_4:0.01\text{Mn}^{4+}$  phosphor (c) (d) Integrated emission intensity and fluorescence decay curve of the  $\text{KNaMoO}_2\text{F}_4:x\text{Mn}^{4+}$  phosphor.

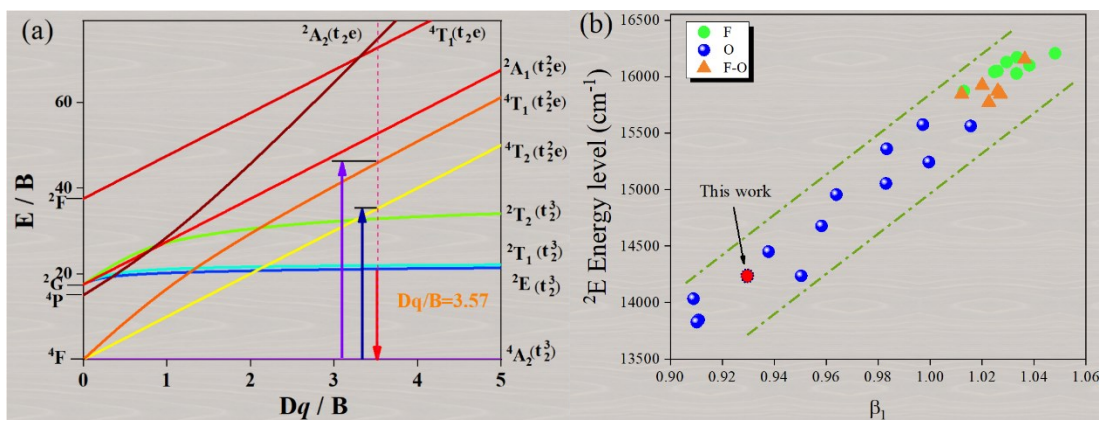

**Fig. S5.** (a) Tanabe-Sugano energy diagram for  $\text{Mn}^{4+}$ . ( $3d^3$ ) in an octahedral crystal field. (b) The relationship between the  $\text{Mn}^{4+}:2\text{E}$  energy level and the calculated nephelauxetic ratio in different  $\beta$  hosts.

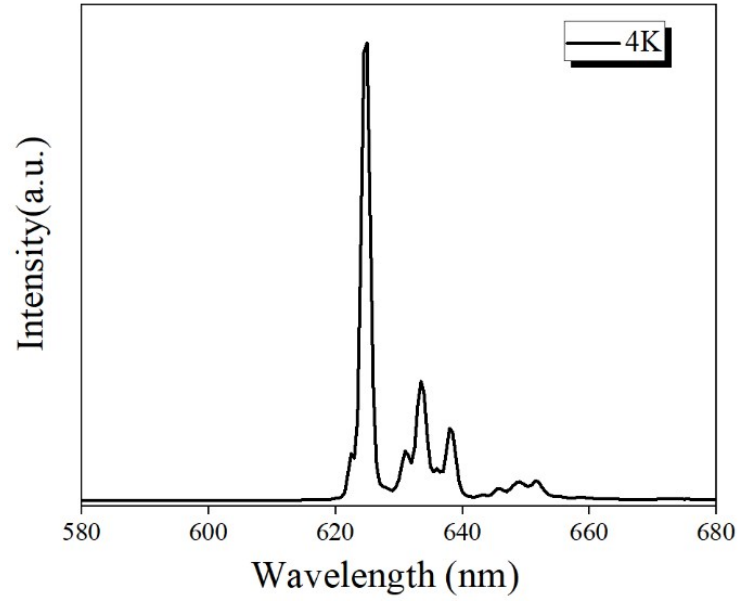

**Fig. S6.** The PL spectrum of  $\text{KNaMoO}_2\text{F}_4:0.01\text{Mn}^{4+}$  at 4 K.
